# Supplementary material
Source: publisher figshare collection journal article supplement (https://tandf.figshare.com/articles/dataset/_/1568570)
Supplement: Supplementary file 1 [file 3]

# Supplement to “Bayesian Nonparametric Dynamic State Space Modeling with Circular Latent States”

Satyaki Mazumder\* and Sourabh Bhattacharya†

Throughout, we refer to our main paper Mazumder and Bhattacharya (2014) as MB.

## **S-1 Smoothness properties of our Gaussian process with linear-circular arguments**

Here we assume that  $\mu(t, \theta)$  is twice differentiable with respect to  $t$  and  $\theta$ , and that the derivatives are bounded. Formally, we assume that  $\frac{\partial^2 \mu(t, \theta)}{\partial t^2}$ ,  $\frac{\partial^2 \mu(t, \theta)}{\partial \theta^2}$ ,  $\frac{\partial^2 \mu(t, \theta)}{\partial t \partial \theta}$  ( $= \frac{\partial^2 \mu(t, \theta)}{\partial \theta \partial t}$ ) exist and are bounded. We denote the covariance function  $\sigma^2 \exp\{-\sigma^4 |t_1 - t_2|^2\} \cos(|\theta_1 - \theta_2|)$  (where  $\sigma^2 = \frac{\psi^{-1}}{2}$ ) by  $K(|t_1 - t_2|, |\theta_1 - \theta_2|)$ .

---

\*Indian Institute of Science Education and Research, Kolkata

†Indian Statistical Institute, Kolkata

### S-1.1 Mean square continuity:

#### 1. With respect to time $t$

$$\begin{aligned} & E[X(t+h, \theta) - X(t, \theta)]^2 \\ &= E[X(t+h, \theta)]^2 + E[X(t, \theta)]^2 - 2E[X(t+h, \theta)X(t, \theta)] \\ &= K(0, 0) + K(0, 0) - 2K(h, 0) \\ &= 2(K(0, 0) - K(h, 0)) \end{aligned}$$

Now as  $h \rightarrow 0$ ,  $E[X(t+h, \theta) - X(t, \theta)]^2 \rightarrow 0$  because of the fact that  $K(h, 0)$  is continuous in  $h$ .

#### 2. With respect to angle $\theta$ :

$$\begin{aligned} & E[X(t, \theta + \alpha) - X(t, \theta)]^2 \\ &= E[X(t, \theta + \alpha)]^2 + E[X(t, \theta)]^2 - 2E[X(t, \theta + \alpha)X(t, \theta)] \\ &= K(0, 0) + K(0, 0) - 2K(0, \alpha) \\ &= 2(K(0, 0) - K(0, \alpha)) \end{aligned}$$

Now as  $\alpha \rightarrow 0$ ,  $E[X(t, \theta + \alpha) - X(t, \theta)]^2 \rightarrow 0$  because of the fact that  $K(0, \alpha)$  is continuous in  $\alpha$ .

#### 3. With respect to time $t$ and angle $\theta$ :

$$E[X(t+h, \theta + \alpha) - X(t, \theta)]^2$$

$$\begin{aligned}
&= E[X(t+h, \theta+\alpha)]^2 + E[X(t, \theta)]^2 - 2E[X(t+h, \theta+\alpha)X(t, \theta)] \\
&= K(0,0) + K(0,0) - 2K(h, \alpha) \\
&= 2(K(0,0) - K(h, \alpha))
\end{aligned}$$

Now as  $(h, \alpha) \rightarrow (0,0)$  then  $E[X(t+h, \theta+\alpha) - X(t, \theta)]^2 \rightarrow 0$  because of the fact that  $K(h, \alpha)$  is continuous in  $h$  and  $\alpha$ .

## S-1.2 Mean square differentiability

A process  $X(\mathbf{u})$ ,  $\mathbf{u} \in \mathbf{R}^d$ , is said to be *Mean Square Differentiable* at  $\mathbf{u}_0$  if for any direction  $\mathbf{p}$  there exists a process  $L_{\mathbf{u}_0}(\mathbf{p})$ , linear in  $\mathbf{p}$ , such that

$$X(\mathbf{u}_0 + \mathbf{p}) = X(\mathbf{u}_0) + L_{\mathbf{u}_0}(\mathbf{p}) + R(\mathbf{u}_0, \mathbf{p}),$$

where  $\mathbf{p} \in \mathbf{R}^d$ , and  $R(\mathbf{u}_0, \mathbf{p})$  satisfies the following

$$\frac{R(\mathbf{u}_0, \mathbf{p})}{\|\mathbf{p}\|} \rightarrow 0, \text{ in } L^2,$$

with  $\|\cdot\|$  being the usual Euclidean norm (for details see Banerjee and Gelfand (2003)).

However, we have  $t \in \mathbb{R}^+$  and  $\theta \in [0, 2\pi]$ , so we can not directly apply the definition of mean square differentiability that is appropriate for  $\mathbb{R}^d$ . For our purpose we define a new metric on time and angular space as

$$d(t_1, t_2, \theta_1, \theta_2) = |t_1 - t_2| + |\theta_1 - \theta_2|,$$

(recall that we have used the angular distance as a metric on the angular space to represent the covariance as a function of distance in time and angle). Note that  $d(\cdot, \cdot, \cdot, \cdot)$  satisfies all the three criteria for being a metric, that is,

1.  $d(t_1, t_2, \theta_1, \theta_2) \geq 0$
2.  $d(t_1, t_2, \theta_1, \theta_2) = 0$  iff  $t_1 = t_2, \theta_1 = \theta_2$
3.  $d(t_1, t_3, \theta_1, \theta_3) \leq [|t_1 - t_2| + |\theta_1 - \theta_2|] + [|t_2 - t_3| + |\theta_1 - \theta_2|]$   
 $= d(t_1, t_2, \theta_1, \theta_2) + d(t_2, t_3, \theta_2, \theta_3)$

With the help of this new metric in time and angular space we define *Mean Square Differentiability* in time and circular domain as

**Definition 1** A process  $X(t, \theta)$  is said to be **Mean Square Differentiable** in  $L^2$  sense at  $(t_0, \theta_0)$  if for any direction  $(h, \alpha)$  there exists a process  $L_{t_0, \theta_0}(h, \alpha)$ , linear in  $h, \alpha$ , such that

$$X(t_0 + h, \theta_0 + \alpha) = X(t_0, \theta_0) + L_{t_0, \theta_0}(h, \alpha) + R(t_0, \theta_0, h, \alpha),$$

where  $R(t_0, \theta_0, h, \alpha)$  satisfies the following condition

$$\frac{R(t_0, \theta_0, h, \alpha)}{d(h, 0, \alpha, 0)} \rightarrow 0, \text{ in } L^2 \text{ as } d(h, 0, \alpha, 0) \rightarrow 0.$$

In our case, since our covariance function  $K(|t_1 - t_2|, |\theta_1 - \theta_2|)$  has partial derivatives of all orders, the partial derivative processes of all orders exist with covariance structures given by partial derivatives of our covariance function; see Section 2.2 of Adler (1981) for details. In fact, the partial derivative processes are all Gaussian processes, and hence, they

are bounded in  $L^2$ .

Hence, we can apply Taylor series expansion to obtain a linear function  $L_{\mathbf{u}_0}(\mathbf{p})$ . The following calculation will make the things clear. Following the multivariate Taylor series expansion (using our new metric) we have

$$X(t_0 + h, \theta_0 + \alpha) = X(t_0, \theta_0) + h \left. \frac{\partial}{\partial t} X(t, \theta) \right|_{t=t_0, \theta=\theta_0} + \alpha \left. \frac{\partial}{\partial \theta} X(t, \theta) \right|_{t=t_0, \theta=\theta_0} + R(t_0, \theta_0, h, \alpha),$$

where  $|R(t_0, \theta_0, h, \alpha)| \leq M^* d^2(h, 0, \alpha, 0)$ , with  $M^* = \max \left\{ \left| \frac{\partial^2 X(t, \theta)}{\partial t^2} \right|, \left| \frac{\partial^2 X(t, \theta)}{\partial t \partial \theta} \right|, \left| \frac{\partial^2 X(t, \theta)}{\partial \theta \partial t} \right|, \left| \frac{\partial^2 X(t, \theta)}{\partial \theta^2} \right| \right\}$  (using the analogy with multivariate Taylor series expansion in  $\mathbf{R}^d$ , recall that in the case of  $\mathbf{R}^d$ ,  $R(\mathbf{u}_0, \mathbf{p}) \leq M^* \|\mathbf{p}\|^2$ ).

Since each of the partial derivative processes is bounded in  $L^2$ , it is obvious that  $M^*$  is also bounded in  $L^2$ . Mean square differentiability of our kernel convolved Gaussian process thus follows.

## S-2 MCMC-based inference

In our MCMC-based inference we include the problem of forecasting  $y_{T+1}$ , given the observed data set  $\mathbf{D}_T$ . The posterior predictive distribution of  $y_{T+1}$  given  $\mathbf{D}_T$  is given by

$$\begin{aligned} [y_{T+1} | \mathbf{D}_T] &= \int [y_{T+1} | \mathbf{D}_T, x_0, \dots, x_{T+1}, \boldsymbol{\beta}_f, \boldsymbol{\beta}_g, \sigma_\epsilon^2, \sigma_\eta^2, \sigma_f^2, \sigma_g^2] \\ &\quad \times [x_0, \dots, x_{T+1}, \boldsymbol{\beta}_f, \boldsymbol{\beta}_g, \sigma_\epsilon^2, \sigma_\eta^2, \sigma_g^2, \sigma_f^2 | \mathbf{D}_T] \\ &\quad d\boldsymbol{\beta}_f d\boldsymbol{\beta}_g d\sigma_\epsilon^2 d\sigma_\eta^2 d\sigma_g^2 d\sigma_f^2 dx_0 \dots dx_{T+1}. \end{aligned} \tag{1}$$

Thus, once we have a sample realization from the joint posterior

$[x_0, \dots, x_{T+1}, \boldsymbol{\beta}_f, \boldsymbol{\beta}_g, \sigma_\epsilon^2, \sigma_\eta^2, \sigma_g^2, \sigma_f^2 | \mathbf{D}_T]$ , we can generate a realization from  $[y_{T+1} | \mathbf{D}_T]$  by simply simulating from  $[y_{T+1} | \mathbf{D}_T, x_0, \dots, x_{T+1}, \boldsymbol{\beta}_f, \boldsymbol{\beta}_g, \sigma_\epsilon^2, \sigma_\eta^2, \sigma_g^2, \sigma_f^2]$ , conditional on the realization obtained from the former joint posterior. Observe that the conditional distribution  $[y_{T+1} = f(T+1, x_{T+1}) + \epsilon_{T+1} | \mathbf{D}_T, x_0, \dots, x_{T+1}, \boldsymbol{\beta}_f, \sigma_\epsilon^2, \sigma_f^2]$  is normal with mean

$$\mu_{y_{T+1}} = \mathbf{h}(T+1, x_{T+1})' \boldsymbol{\beta}_f + \mathbf{s}_{f, D_T}(T+1, x_{T+1})' \mathbf{A}_{f, D_T}^{-1} (\mathbf{D}_T - \mathbf{H}_{D_T} \boldsymbol{\beta}_f) \quad (2)$$

and variance

$$\sigma_{y_{T+1}}^2 = \sigma_\epsilon^2 + \sigma_f^2 \left( 1 - (\mathbf{s}_{f, D_T}(T+1, x_{T+1}))' \mathbf{A}_{f, D_T}^{-1} \mathbf{s}_{f, D_T}(T+1, x_{T+1}) \right). \quad (3)$$

Using the auxiliary variables  $K_1, \dots, K_{T+1}$ , the posterior distribution of the latent circular variables and the other parameters can be represented as

$$\begin{aligned} & [x_0, x_1, \dots, x_{T+1}, \boldsymbol{\beta}_f, \boldsymbol{\beta}_g, \sigma_\epsilon^2, \sigma_\eta^2, \sigma_g^2, \sigma_f^2 | \mathbf{D}_T] \\ &= \sum_{K_1, \dots, K_{T+1}} \int [x_0, x_1, \dots, x_T, x_{T+1}, \boldsymbol{\beta}_f, \boldsymbol{\beta}_g, \sigma_\epsilon^2, \sigma_\eta^2, \sigma_g^2, \sigma_f^2, g^*(1, x_0), \mathbf{D}_z, K_1, \dots, K_T, K_{T+1} | \mathbf{D}_T] \\ & \quad \times dg^*(1, x_0) d\mathbf{D}_z \\ &\propto \sum_{K_1, \dots, K_{T+1}} \int [x_0, x_1, \dots, x_{T+1}, \boldsymbol{\beta}_f, \boldsymbol{\beta}_g, \sigma_\epsilon^2, \sigma_\eta^2, \sigma_g^2, \sigma_f^2, g^*(1, x_0), \mathbf{D}_z, K_1, \dots, K_T, K_{T+1}, \mathbf{D}_T] \\ & \quad \times dg^*(1, x_0) d\mathbf{D}_z \\ &= \sum_{K_1, \dots, K_{T+1}} \int [\boldsymbol{\beta}_f][\boldsymbol{\beta}_g][\sigma_\epsilon^2][\sigma_\eta^2][\sigma_g^2][\sigma_f^2][x_0][g^*(1, x_0) | x_0, \boldsymbol{\beta}_g, \sigma_g^2][\mathbf{D}_z | g^*(1, x_0), x_0, \boldsymbol{\beta}_g, \sigma_g^2] \\ & \quad [x_1 | g^*(1, x_0), \sigma_\eta^2, K_1][K_1 | g^*(1, x_0), \sigma_\eta^2][\mathbf{D}_T | x_1, \dots, x_T, \boldsymbol{\beta}_f, \sigma_\epsilon^2, \sigma_f^2] \end{aligned}$$

$$\prod_{t=2}^{T+1} [x_t | \boldsymbol{\beta}_g, \sigma_\eta^2, \sigma_g^2, \mathbf{D}_z, x_{t-1}, K_t] \prod_{t=2}^{T+1} [K_t | \boldsymbol{\beta}_g, \sigma_\eta^2, \sigma_g^2, \mathbf{D}_z, x_{t-1}] dg^*(1, x_0) d\mathbf{D}_z. \quad (4)$$

In order to obtain MCMC samples from  $[x_0, x_1, \dots, x_{T+1}, \boldsymbol{\beta}_f, \boldsymbol{\beta}_g, \sigma_\epsilon^2, \sigma_\eta^2, \sigma_g^2, \sigma_f^2 | \mathbf{D}_T]$ , we first carry out MCMC simulations from the joint posterior which is proportional to integrand (4). Ignoring  $g^*(1, x_0)$ ,  $\mathbf{D}_z$  and  $K_1, \dots, K_{T+1}$  in these MCMC simulations and storing the realizations associated with the remaining parameters yield the desired samples.

## S-2.1 Full conditional distributions

Here we provide the full conditional distributions of the unknowns. In what follows, we shall express  $[g^*(1, x_0) | x_0, \boldsymbol{\beta}_g, \sigma_g^2] [\mathbf{D}_z | g^*(1, x_0), x_0, \boldsymbol{\beta}_g, \sigma_g^2]$  as  $[\mathbf{D}_z, g^*(1, x_0) | x_0, \boldsymbol{\beta}_g, \sigma_g^2]$ .

$$[\boldsymbol{\beta}_f | \dots] \propto [\boldsymbol{\beta}_f] [\mathbf{D}_T | x_1, \dots, x_T, \boldsymbol{\beta}_f, \sigma_\epsilon^2] \quad (5)$$

$$[\boldsymbol{\beta}_g | \dots] \propto [\boldsymbol{\beta}_g] [\mathbf{D}_z, g^*(1, x_0) | x_0, \boldsymbol{\beta}_g, \sigma_g^2] \prod_{t=2}^{T+1} [x_t | \boldsymbol{\beta}_g, \sigma_\eta^2, \sigma_g^2, \mathbf{D}_z, x_{t-1}, K_t] \prod_{t=2}^{T+1} [K_t | \boldsymbol{\beta}_g, \sigma_\eta^2, \sigma_g^2, \mathbf{D}_z, x_{t-1}] \quad (6)$$

$$[\sigma_\epsilon^2 | \dots] \propto [\sigma_\epsilon^2] [\mathbf{D}_T | x_1, \dots, x_T, \boldsymbol{\beta}_f, \sigma_\epsilon^2] \quad (7)$$

$$[\sigma_f^2 | \dots] \propto [\sigma_f^2] [\mathbf{D}_T | x_1, \dots, x_T, \boldsymbol{\beta}_f, \sigma_f^2] \quad (8)$$

$$[\sigma_\eta^2 | \dots] \propto [\sigma_\eta^2] [x_1 | g^*(1, x_0), \sigma_\eta^2, K_1] [K_1 | g^*(1, x_0), \sigma_\eta^2] \prod_{t=2}^{T+1} [x_t | \boldsymbol{\beta}_g, \sigma_\eta^2, \sigma_g^2, \mathbf{D}_z, x_{t-1}, K_t] \prod_{t=2}^{T+1} [K_t | \boldsymbol{\beta}_g, \sigma_\eta^2, \sigma_g^2, \mathbf{D}_z, x_{t-1}] \quad (9)$$

$$[\sigma_g^2 | \dots] \propto [\sigma_g^2] [\mathbf{D}_z, g^*(1, x_0) | x_0, \boldsymbol{\beta}_g, \sigma_g^2] \prod_{t=2}^{T+1} [x_t | \boldsymbol{\beta}_g, \sigma_\eta^2, \sigma_g^2, \mathbf{D}_z, x_{t-1}, K_t] \prod_{t=2}^{T+1} [K_t | \boldsymbol{\beta}_g, \sigma_\eta^2, \sigma_g^2, \mathbf{D}_z, x_{t-1}]$$

$$\sigma_\eta^2, \mathbf{D}_z, x_{t-1}] \quad (10)$$

$$[x_0 | \cdots] \propto [x_0] [\mathbf{D}_z, g^*(1, x_0) | x_0, \boldsymbol{\beta}_g, \sigma_g^2] \quad (11)$$

$$[g^*(1, x_0) | \cdots] \propto [g^*(1, x_0) | x_0, \boldsymbol{\beta}_g, \sigma_g^2] [\mathbf{D}_z | g^*(1, x_0), x_0, \boldsymbol{\beta}_g, \sigma_g^2] [x_1 | g^*(1, x_0), x_0, \sigma_\eta^2, K_1] \\ [K_1 | g^*(1, x_0), \sigma_\eta^2] \quad (12)$$

$$[\mathbf{D}_z | \cdots] \propto [\mathbf{D}_z | g^*(1, x_0), x_0, \boldsymbol{\beta}_g, \sigma_g^2] \prod_{t=2}^{T+1} [x_t | \boldsymbol{\beta}_g, \sigma_g^2, \sigma_\eta^2, \mathbf{D}_z, x_{t-1}, K_t] \prod_{t=2}^{T+1} [K_t | \boldsymbol{\beta}_g, \sigma_g^2, \sigma_\eta^2, \\ \mathbf{D}_z, x_{t-1}] \quad (13)$$

$$[x_1 | \cdots] \propto [x_1 | g^*(1, x_0), \sigma_\eta^2] [\mathbf{D}_T | x_1, \dots, x_T, \boldsymbol{\beta}_f, \sigma_\epsilon^2] \\ [x_2 | \boldsymbol{\beta}_g, \sigma_g^2, \sigma_\eta^2, \mathbf{D}_z, x_1, K_2] [K_2 | \boldsymbol{\beta}_g, \sigma_g^2, \sigma_\eta^2, \mathbf{D}_z, x_1] \quad (14)$$

$$[x_{T+1} | \cdots] \propto [x_{T+1} | \boldsymbol{\beta}_g, \sigma_g^2, \sigma_\eta^2, \mathbf{D}_z, x_T, K_{T+1}] \quad (15)$$

$$[x_{t+1} | \cdots] \propto [x_{t+1} | \boldsymbol{\beta}_g, \sigma_g^2, \sigma_\eta^2, \mathbf{D}_z, x_t] [x_{t+2} | \boldsymbol{\beta}_g, \sigma_g^2, \sigma_\eta^2, \mathbf{D}_z, x_{t+1}, K_{t+2}] [K_{t+2} | \boldsymbol{\beta}_g, \sigma_g^2, \sigma_\eta^2, \\ \mathbf{D}_z, x_{t+1}] [\mathbf{D}_T | x_1, \dots, x_T, \boldsymbol{\beta}_f, \sigma_\epsilon^2], \quad t = 1, \dots, T-1 \quad (16)$$

Finally, we write down the full conditional distribution of  $K_t$ , for  $t = 1, \dots, T+1$ , as

$$[K_1 | \cdots] \propto [K_1 | g^*(1, x_0), \sigma_\eta^2] [x_1 | g^*(1, x_0), \boldsymbol{\beta}_g, \sigma_g^2, K_1] \quad (17)$$

$$[K_t | \cdots] \propto [x_t | \boldsymbol{\beta}_g, \sigma_g^2, \sigma_\eta^2, \mathbf{D}_z, x_{t-1}, K_t] [K_t | \boldsymbol{\beta}_g, \sigma_g^2, \sigma_\eta^2, \mathbf{D}_z, x_{t-1}], \quad t = 2, \dots, T+1. \quad (18)$$

### S-2.1.1 Updating $\boldsymbol{\beta}_f$ by Gibbs steps

The full conditional of  $\boldsymbol{\beta}_f$  is a multivariate normal distribution with mean

$$E[\boldsymbol{\beta}_f | \cdots] = \{\mathbf{H}'_{D_T} (\sigma_f^2 \mathbf{A}_{f,D_T} + \sigma_\epsilon^2 I)^{-1} \mathbf{H}_{D_T} + \boldsymbol{\Sigma}_{\boldsymbol{\beta}_{f,0}}\}^{-1} \\ \times \{\mathbf{H}'_{D_T} (\sigma_f^2 \mathbf{A}_{f,D_T} + \sigma_\epsilon^2 I)^{-1} \mathbf{D}_T + \boldsymbol{\Sigma}_{\boldsymbol{\beta}_{f,0}}^{-1} \boldsymbol{\beta}_{f,0}\} \quad (19)$$



and variance

$$V[\boldsymbol{\beta}_f | \dots] = \{\mathbf{H}'_{D_T}(\sigma_f^2 \mathbf{A}_{f,D_T} + \sigma_\epsilon^2 I)^{-1} \mathbf{H}_{D_T} + \boldsymbol{\Sigma}_{\beta_{f,0}}\}^{-1}. \quad (20)$$

### S-2.1.2 Updating $\boldsymbol{\beta}_g$

We first explicitly write down the right hand side of (6).

$$\begin{aligned} & [\boldsymbol{\beta}_g][\mathbf{D}_z, g^*(1, x_0) | x_0, \boldsymbol{\beta}_g] \prod_{t=2}^{T+1} [x_t | \boldsymbol{\beta}_g, \sigma_\eta^2, \mathbf{D}_z, x_{t-1}, K_t] \prod_{t=2}^{T+1} [K_t | \boldsymbol{\beta}_g, \sigma_\eta^2, \mathbf{D}_z, x_{t-1}] \\ & \propto \exp \left( -\frac{1}{2} (\boldsymbol{\beta}_g - \boldsymbol{\beta}_{g,0})' \boldsymbol{\Sigma}_{\beta_{g,0}}^{-1} (\boldsymbol{\beta}_g - \boldsymbol{\beta}_{g,0}) \right) \\ & \exp \left( -\frac{1}{2} [(\mathbf{D}_z, g^*)' - (\mathbf{H}_{D_z} \boldsymbol{\beta}_g, \mathbf{h}'(1, x_0))]' \mathbf{A}_{D_z, g^*(1, x_0)}^{-1} [(\mathbf{D}_z, g^*)' - (\mathbf{H}_{D_z} \boldsymbol{\beta}_g, \mathbf{h}'(1, x_0))]' \right) \\ & \exp \left\{ -\sum_{i=2}^{T+1} \frac{1}{2\sigma_{x_t}^2} (x_t + 2\pi K_t - \mu_{x_t})^2 \right\} \prod_{t=2}^{T+1} I_{[0, 2\pi]}(x_t) \end{aligned} \quad (21)$$

Observe that the denominator of  $[x_t | \boldsymbol{\beta}_g, \sigma_\eta^2, \mathbf{D}_z, x_{t-1}, K_t]$  cancels with the density of  $[K_t | \boldsymbol{\beta}_g, \sigma_\eta^2, \mathbf{D}_z, x_{t-1}]$  for each  $t = 2, \dots, T+1$ . Also we note that the indicator function does not involve  $\boldsymbol{\beta}_g$  for all  $t = 2, \dots, T+1$ . Therefore, after simplifying the exponent terms and ignoring the indicator function we can write

$$[\boldsymbol{\beta}_g | \dots] \propto \exp \left\{ -\frac{1}{2} (\boldsymbol{\beta}_g - \mu_{\beta_g})' \boldsymbol{\Sigma}_{\beta_g}^{-1} (\boldsymbol{\beta}_g - \mu_{\beta_g}) \right\}, \quad (22)$$

where

$$\begin{aligned}
\mu_{\beta_g} &= E[\beta_g | \dots] = \left\{ \Sigma_{\beta_g,0}^{-1} + \frac{1}{\sigma_g^2} [\mathbf{H}'_{D_z}, \mathbf{h}(1, x_0)] \mathbf{A}_{D_z, g^*(1, x_0)}^{-1} [\mathbf{H}'_{D_z}, \mathbf{h}(1, x_0)]' \right. \\
&\quad \left. + \sum_{t=1}^T \frac{(\mathbf{H}'_{D_z} \mathbf{A}_{g, D_z}^{-1} \mathbf{s}_{g, D_z}(t+1, x_t) - \mathbf{h}(t+1, x_t)) (\mathbf{H}'_{D_z} \mathbf{A}_{g, D_z}^{-1} \mathbf{s}_{g, D_z}(t+1, x_t) - \mathbf{h}(t+1, x_t))'}{\sigma_{x_t}^2} \right\}^{-1} \\
&\quad \left\{ \Sigma_{\beta_g,0}^{-1} \beta_{g,0} + \frac{1}{\sigma_g^2} [\mathbf{H}'_{D_z}, \mathbf{h}(1, x_0)] \mathbf{A}_{D_z, g^*(1, x_0)}^{-1} [\mathbf{D}_z, g^*(1, x_0)] \right. \\
&\quad \left. + \sum_{t=1}^T \frac{(x_{t+1} + 2\pi K_{t+1} - \mathbf{s}_{g, D_z}(t+1, x_t)' \mathbf{A}_{g, D_z}^{-1} \mathbf{D}_z) (\mathbf{h}(t+1, x_t) - \mathbf{H}'_{D_z} \mathbf{A}_{g, D_z}^{-1} \mathbf{s}_{g, D_z}(t+1, x_t))}{\sigma_{x_t}^2} \right\} \\
&\hspace{20em} (23)
\end{aligned}$$

and

$$\begin{aligned}
\Sigma_{\beta_g} &= V[\beta_g | \dots] = \left\{ \Sigma_{\beta_g,0}^{-1} + \frac{1}{\sigma_g^2} [\mathbf{H}'_{D_z}, \mathbf{h}(1, x_0)] \mathbf{A}_{D_z, g^*(1, x_0)}^{-1} [\mathbf{H}'_{D_z}, \mathbf{h}(1, x_0)]' \right. \\
&\quad \left. + \sum_{t=1}^T \frac{(\mathbf{H}'_{D_z} \mathbf{A}_{g, D_z}^{-1} \mathbf{s}_{g, D_z}(t+1, x_t) - \mathbf{h}(t+1, x_t)) (\mathbf{H}'_{D_z} \mathbf{A}_{g, D_z}^{-1} \mathbf{s}_{g, D_z}(t+1, x_t) - \mathbf{h}(t+1, x_t))'}{\sigma_{x_t}^2} \right\}. \\
&\hspace{20em} (24)
\end{aligned}$$

Hence  $[\beta_g | \dots]$  follows a four-variate normal distribution with mean and variance  $\mu_{\beta_g}$  and  $\Sigma_{\beta_g}$ , respectively, and therefore, we update  $\beta_g$  using Gibbs sampling.

### S-2.1.3 Updating $\sigma_f^2$ and $\sigma_g^2$

The mathematical form of the full conditional distributions of  $\sigma_f^2$  and  $\sigma_g^2$  are not tractable, so we update  $\sigma_f^2$  and  $\sigma_g^2$  by random walk Metropolis-Hastings steps.

#### S-2.1.4 Updating $\sigma_\epsilon^2$

The mathematical form of the full conditional distribution of  $\sigma_\epsilon^2$  is not tractable, so we update  $\sigma_\epsilon^2$  by a random walk Metropolis-Hastings step.

#### S-2.1.5 Updating $\sigma_\eta^2$

For full conditional distribution of  $\sigma_\eta^2$  right hand side of (9) simplifies a bit in the sense that the denominator of  $[x_t|\boldsymbol{\beta}_g, \sigma_\eta^2, \mathbf{D}_z, x_{t-1}, K_t]$  cancels with the density of  $[K_t|\boldsymbol{\beta}_g, \sigma_\eta^2, \mathbf{D}_z, x_{t-1}]$  for  $t = 2, \dots, T+1$ , and the denominator of  $[x_1|g^*(1, x_0), \boldsymbol{\beta}_g, \sigma_\eta^2, K_1]$  cancels with the density of  $[K_1|g^*(1, x_0), \boldsymbol{\beta}_g, \sigma_\eta^2]$ , which, in turn, gives the following form:

$$[\sigma_\eta^2|\dots] \propto [\sigma_\eta^2] \exp \left\{ - \sum_{i=2}^{T+1} \frac{1}{2\sigma_{x_t}^2} (x_t + 2\pi K_t - \mu_{x_t})^2 \right\} \exp \left\{ - \frac{1}{2\sigma_\eta^2} (x_1 + 2\pi K_1 - g^*)^2 \right\}. \quad (25)$$

However, the above equation does not have a closed form; hence, for updating  $\sigma_\eta^2$  as well, we use random walk Metropolis-Hastings.

#### S-2.1.6 Updating $x_0$

The full conditional distribution of  $x_0$  is not tractable and hence again here we use random walk Metropolis-Hastings for updating  $x_0$ . Now note that  $x_0$  is a circular random variable, so to update  $x_0^{(old)}$  to  $x_0^{(new)}$  we use the vonMises distribution with location parameter  $x_0^{(old)}$ .

### S-2.1.7 Updating $g^*(1, x_0)$

Equation (12), after cancelling the denominator of  $[x_1|g^*(1, x_0), x_0, \boldsymbol{\beta}_g, \sigma_\eta^2, K_1]$  with the density of  $[K_1|g^*(1, x_0), x_0, \boldsymbol{\beta}_g, \sigma_\eta^2]$ , and ignoring the indicator function on  $x_0$ , reduces to

$$[g^*(1, x_0)|\dots] \propto [g^*(1, x_0)|x_0, \boldsymbol{\beta}_g][\mathbf{D}_z|g^*(1, x_0), x_0, \boldsymbol{\beta}_g] \exp \left\{ -\frac{1}{2\sigma_\eta^2}(x_1 + 2\pi K_1 - g^*)^2 \right\}.$$

After further simplification the full conditional distribution of  $g^*(1, x_0)$  reduces to

$$[g^*(1, x_0)|\dots] \propto \exp \left\{ -\frac{1}{2\gamma_g^2}(g^* - \nu_g)^2 \right\}, \quad (26)$$

where

$$\begin{aligned} \nu_g = E[g^*(1, x_0)|\dots] &= \left\{ \frac{1}{\sigma_\eta^2} + \frac{1}{\sigma_g^2}(1 + \mathbf{s}_{g,D_z}(1, x_0)' \boldsymbol{\Sigma}_{g,D_z}^{-1} \mathbf{s}_{g,D_z}(1, x_0)) \right\}^{-1} \\ &\quad \left\{ \frac{x_1 + 2\pi K_1}{\sigma_\eta^2} + \frac{1}{\sigma_g^2}(\mathbf{h}(1, x_0)' \boldsymbol{\beta}_g + \mathbf{s}_{g,D_z}' \boldsymbol{\Sigma}_{g,D_z}^{-1} \mathbf{D}_z^*) \right\} \end{aligned} \quad (27)$$

and

$$\gamma_g^2 = V[g^*(1, x_0)|\dots] = \left\{ \frac{1}{\sigma_\eta^2} + \frac{1}{\sigma_g^2}(1 + \mathbf{s}_{g,D_z}(1, x_0)' \boldsymbol{\Sigma}_{g,D_z}^{-1} \mathbf{s}_{g,D_z}(1, x_0)) \right\}, \quad (28)$$

with

$$\mathbf{D}_z^* = \mathbf{D}_z - \mathbf{H}_{D_z} \boldsymbol{\beta}_g + \mathbf{h}(1, x_0)' \boldsymbol{\beta}_g \mathbf{s}_{g,D_z}, \quad (29)$$

and

$$\boldsymbol{\Sigma}_{g,D_z} = \mathbf{A}_{g,D_z} - \mathbf{s}_{g,D_z}(1, x_0) \mathbf{s}_{g,D_z}(1, x_0)'. \quad (30)$$

Hence  $[g^*|\cdots]$  follows a normal distribution with mean  $\nu_g$  and variance  $\gamma_g$ . Therefore, we update  $g^*$  using Gibbs sampling.

### S-2.1.8 Updating $D_z$

Here also we observe that in the full conditional distribution of  $D_z$ , the denominator of  $[x_t|\beta_g, \sigma_\eta^2, D_z, x_{t-1}, K_t]$  cancels with the density of  $[K_t|\beta_g, \sigma_\eta^2, D_z, x_{t-1}]$  for each  $t = 2, \dots, T+1$ . After simplification it turns out that the full conditional distribution of  $D_z$  is an  $n$ -variate normal with mean

$$E(D_z|\cdots) = \left\{ \frac{\Sigma_{g,D_z}^{-1}}{\sigma_g^2} + \mathbf{A}_{g,D_z}^{-1} \left( \sum_{t=1}^T \frac{s_{g,D_z}(t+1, x_t) s'_{g,D_z}(t+1, x_t)}{\sigma_{x_t}^2} \right) \mathbf{A}_{g,D_z}^{-1} \right\}^{-1} \\ \times \left\{ \frac{\Sigma_{g,D_z}^{-1} \boldsymbol{\mu}_{g,D_z}}{\sigma_g^2} + \mathbf{A}_{g,D_z}^{-1} \sum_{t=1}^T \frac{s_{g,D_z}(t+1, x_t) \{x_{t+1} + 2\pi K_{t+1} - \beta'_g(\mathbf{h}(1, t+1, x_t) - \mathbf{H}'_{D_z} \mathbf{A}_{g,D_z}^{-1} s_{g,D_z}(t+1, x_t))\}}{\sigma_{x_t}^2} \right\} \quad (31)$$

and covariance matrix

$$V(D_z|\cdots) = \left\{ \frac{\Sigma_{g,D_z}^{-1}}{\sigma_g^2} + \mathbf{A}_{g,D_z}^{-1} \left( \sum_{t=1}^T \frac{s_{g,D_z}(t+1, x_t) s'_{g,D_z}(t+1, x_t)}{\sigma_{x_t}^2} \right) \mathbf{A}_{g,D_z}^{-1} \right\}^{-1}. \quad (32)$$

Therefore, we update  $D_z$  using Gibbs sampling.

### S-2.1.9 Updating $x_1$

For the full conditional distribution of  $x_1$  we write down the complete expression of (14) as follows:

$$\begin{aligned}
[x_1 | \dots] &\propto \frac{\frac{1}{\sqrt{2\pi}\sigma_\eta} \exp\left(-\frac{1}{2\sigma_\eta^2}(x_1 + 2\pi K_1 - g^*)^2\right) I_{[0,2\pi]}(x_1)}{\Phi\left(\frac{2\pi(K_1+1)-g^*}{\sigma_\eta}\right) - \Phi\left(\frac{2\pi K_1-g^*}{\sigma_\eta}\right)} \\
&\quad \exp\left\{-\frac{1}{2}(\mathbf{D}_T - \boldsymbol{\mu}_{y_t})' \boldsymbol{\Sigma}_{y_t}^{-1}(\mathbf{D}_T - \boldsymbol{\mu}_{y_t})\right\} \\
&\quad \frac{1}{\sqrt{2\pi}\sigma_{x_2}} \exp\left(-\frac{1}{2\sigma_{x_2}^2}(x_2 + 2\pi K_2 - \mu_{x_2})^2\right), \tag{33}
\end{aligned}$$

where  $\boldsymbol{\mu}_{y_t}$  and  $\boldsymbol{\Sigma}_{y_t}$  are given by (10) and (11) of MB. Here we note that the denominator of  $[x_2 | \boldsymbol{\beta}_g, \sigma_\eta^2, \mathbf{D}_z, x_1, K_2]$  cancels with  $[K_2 | \boldsymbol{\beta}_g, \sigma_\eta^2, \mathbf{D}_z, x_1]$ . Also we ignore the indicator term associated with  $x_2$ . We note that the term  $\Phi\left(\frac{2\pi(K_1+1)-g^*}{\sigma_\eta}\right) - \Phi\left(\frac{2\pi K_1-g^*}{\sigma_\eta}\right)$  does not involve  $x_1$ . Hence ignoring  $\Phi\left(\frac{2\pi(K_1+1)-g^*}{\sigma_\eta}\right) - \Phi\left(\frac{2\pi K_1-g^*}{\sigma_\eta}\right)$  we get

$$\begin{aligned}
[x_1 | \dots] &\propto \frac{1}{\sqrt{2\pi}\sigma_\eta} \exp\left(-\frac{1}{2\sigma_\eta^2}(x_1 + 2\pi K_1 - g^*)^2\right) I_{[0,2\pi]}(x_1) \\
&\quad \exp\left\{-\frac{1}{2}(\mathbf{D}_T - \boldsymbol{\mu}_{y_t})' \boldsymbol{\Sigma}_{y_t}^{-1}(\mathbf{D}_T - \boldsymbol{\mu}_{y_t})\right\} \\
&\quad \frac{1}{\sqrt{2\pi}\sigma_{x_2}} \exp\left(-\frac{1}{2\sigma_{x_2}^2}(x_2 + 2\pi K_2 - \mu_{x_2})^2\right), \tag{34}
\end{aligned}$$

However, it is not possible to get a closed form expression of  $[x_1 | \dots]$ , so we update it by random walk Metropolis-Hastings.

### S-2.1.10 Updating $x_{t+1}$ , $t = 1, \dots, T-1$

For  $x_{t+1}$  we have the same structure as for  $x_1$ , except for some changes in the parameters.

To be precise, the full conditional distribution can be explicitly written as

$$\begin{aligned}
[x_{t+1} | \dots] &\propto \frac{\frac{1}{\sqrt{2\pi}\sigma_{x_{t+1}}} \exp\left(-\frac{1}{2\sigma_{x_{t+1}}^2}(x_{t+1} + 2\pi K_{t+1} - \mu_{x_{t+1}})^2\right) I_{[0,2\pi]}(x_{t+1})}{\Phi\left(\frac{2\pi(K_{t+1}+1)-\mu_{x_{t+1}}}{\sigma_{x_{t+1}}}\right) - \Phi\left(\frac{2\pi K_{t+1}-\mu_{x_{t+1}}}{\sigma_{x_{t+1}}}\right)} \\
&\quad \frac{1}{\sqrt{2\pi}\sigma_{x_{t+2}}} \exp\left(-\frac{1}{2\sigma_{x_{t+2}}^2}(x_{t+2} + 2\pi K_{t+2} - \mu_{x_{t+2}})^2\right) \\
&\quad \exp\left\{-\frac{1}{2}(\mathbf{D}_T - \boldsymbol{\mu}_{y_t})' \boldsymbol{\Sigma}_{y_t}^{-1}(\mathbf{D}_T - \boldsymbol{\mu}_{y_t})\right\}. \tag{35}
\end{aligned}$$

We note here that  $\Phi\left(\frac{2\pi(K_{t+1}+1)-\mu_{x_{t+1}}}{\sigma_{x_{t+1}}}\right) - \Phi\left(\frac{2\pi K_{t+1}-\mu_{x_{t+1}}}{\sigma_{x_{t+1}}}\right)$  does not involve  $x_{t+1}$  because  $\mu_{x_{t+1}}$  and  $\sigma_{x_{t+1}}$  depend on  $x_t$ , not on  $x_{t+1}$ , and hence we can ignore the term  $\Phi\left(\frac{2\pi(K_{t+1}+1)-\mu_{x_{t+1}}}{\sigma_{x_{t+1}}}\right) - \Phi\left(\frac{2\pi K_{t+1}-\mu_{x_{t+1}}}{\sigma_{x_{t+1}}}\right)$  and rewrite (35) as

$$\begin{aligned}
[x_{t+1} | \dots] &\propto \frac{1}{\sqrt{2\pi}\sigma_{x_{t+1}}} \exp\left(-\frac{1}{2\sigma_{x_{t+1}}^2}(x_{t+1} + 2\pi K_{t+1} - \mu_{x_{t+1}})^2\right) I_{[0,2\pi]}(x_{t+1}) \\
&\quad \frac{1}{\sqrt{2\pi}\sigma_{x_{t+2}}} \exp\left(-\frac{1}{2\sigma_{x_{t+2}}^2}(x_{t+2} + 2\pi K_{t+2} - \mu_{x_{t+2}})^2\right) \\
&\quad \exp\left\{-\frac{1}{2}(\mathbf{D}_T - \boldsymbol{\mu}_{y_t})' \boldsymbol{\Sigma}_{y_t}^{-1}(\mathbf{D}_T - \boldsymbol{\mu}_{y_t})\right\}. \tag{36}
\end{aligned}$$

Here also the expression of the full conditional distribution of  $x_{t+1}$  is not tractable. So, we adopt random walk Metropolis-Hastings to update  $x_{t+1}$ , for  $t = 1, \dots, T$ .

### S-2.1.11 Updating $x_{T+1}$

The full conditional distribution of  $x_{T+1}$  has probability density function of the form (29) of MB with parameters

$$\mu_{x_{T+1}} = \mathbf{h}(1, x_T)' \boldsymbol{\beta}_g + \mathbf{s}_{g,D_z}(T+1, x_T)' \mathbf{A}_{g,D_z}^{-1} (\mathbf{D}_z - \mathbf{H}_{D_z} \boldsymbol{\beta}_g) \quad (37)$$

and

$$\sigma_{x_{T+1}}^2 = \sigma_\eta^2 + \sigma_g^2 \{1 - \mathbf{s}_{g,D_z}(T+1, x_T)' \mathbf{A}_{g,D_z}^{-1} \mathbf{s}_{g,D_z}(T+1, x_T)\}. \quad (38)$$

We note here that given all unknowns except  $x_{T+1}$ ,  $x_{T+1} + 2\pi K_{T+1}$  follows a truncated normal distribution with left side truncation at  $2\pi K_{T+1}$  and right side truncation at  $2\pi(K_{T+1} + 1)$  ( $K_{T+1}$  is constant in this case). Hence we update  $x_{T+1} + 2\pi K_{T+1}$  using Gibbs sampling and then subtract  $2\pi K_{T+1}$  from it to update  $x_{T+1}$ .

### S-2.1.12 Updating $K_t$ , $t = 1, \dots, T+1$

The full conditional distribution of  $K_1$  reduces to the following form

$$[K_1 | \dots] \propto \frac{1}{\sqrt{2\pi}\sigma_\eta} \exp\left(-\frac{1}{2\sigma_\eta^2}(x_1 + 2\pi K_1 - g^*)^2\right) I_{\{\dots, -1, 0, 1, \dots\}}(K_1), \quad (39)$$

and similarly the full conditional distribution of  $K_t$  becomes

$$[K_t | \dots] \propto \frac{1}{\sqrt{2\pi}\sigma_{x_t}} \exp\left(-\frac{1}{2\sigma_{x_t}^2}(x_t + 2\pi K_t - \mu_{x_t})^2\right) I_{\{\dots, -1, 0, 1, \dots\}}(K_t), \quad (40)$$

for  $t = 2, \dots, T+1$ . We update  $K_t$ , for  $t = 1, \dots, K+1$ , by random walk Metropolis-Hastings.



## References

- Adler, R. J. (1981). *The Geometry of Random Fields*. Wiley, London.
- Banerjee, S. and Gelfand, A. E. (2003). On Smoothness Properties of Spatial Processes. *Journal of Multivariate Analysis*, **84**, 85–100.
- Mazumder, S. and Bhattacharya, S. (2014). Bayesian Nonparametric Dynamic State-Space Modeling with Circular Latent States. Submitted.
